# Supplementary material for: Forecasting influenza epidemics by integrating internet search queries and traditional surveillance data with the support vector machine regression model in Liaoning, from 2011 to 2015
Source: PeerJ. 2018 Jun 25;6:e5134. doi: 10.7717/peerj.5134 (PMC6022725; doi:10.7717/peerj.5134)
Supplement: Supplemental Information 1 [file peerj-06-5134-s001.xlsx]

## Sheet: Sheet1
year	month	influenza cases	lag one month influenza cases	Flu	flu symptoms	influenza type A	influenza vaccine	Is it necessary to get vaccinated against the flu?	flu virus	the symptoms of flu	influenza drugs	the symptom of type A flu	prevent flu	swine flu	H1N1 flu	Beijing flu	swine flu symptom	how to prevent flu	viral flu	how to prevent flu	Spanish flu	flu prevention	side effects of flu vaccine	the prevention measures of flu	type A H1N1 flu	flu therapy	the prevention of flu	influenza epidemic	influenza vaccine price	type A flu	type A flu virus	new type of flu	A influenza	love flu strain	flu concept stock	seasonal influenza	love flu	type A H1N1 flu virus	new flu	how to treat swine flu	Influenza transmission route	The route of transmission of flu	treatment program of A type H1N1 flu	flu (space) symptom	H1N1 flu symptom	Sheep flu	super flu	the symptoms of swine flu	Taiwan flu
2011	1	32		81	67	45	48	13	38	43	50	26	63	58	58	34	46	20	7	13	13	13	9	0	60	13	24	29	22	11	0	14	29	34	0	11	35	11	11	0	0	1	9	7	51	0	3	5	0
	2	12	32	82	65	37	47	4	35	25	46	44	39	42	36	22	33	20	2	14	14	12	8	0	63	10	29	40	14	2	0	14	27	39	26	0	33	14	24	0	2	0	16	2	67	0	2	10	8
	3	32	12	73	58	24	40	9	48	24	41	14	54	51	24	5	31	24	11	30	13	7	1	0	50	0	39	20	16	0	0	0	12	35	11	3	16	7	5	0	5	1	11	0	46	1	0	5	9
	4	12	32	67	53	15	38	1	38	9	25	1	47	47	31	0	23	13	1	17	11	7	1	0	56	1	31	19	3	0	0	1	9	36	1	0	17	13	3	0	0	0	3	0	0	0	0	0	0
	5	6	12	60	39	11	34	0	33	18	3	0	45	51	43	1	1	20	0	14	24	0	0	0	40	5	18	1	0	0	0	0	7	32	0	0	16	16	9	0	0	0	1	0	0	1	0	0	0
	6	5	6	51	21	9	28	1	36	1	0	0	32	35	35	0	19	3	0	1	11	0	0	0	47	1	15	0	1	0	0	0	13	28	0	0	28	22	3	0	0	0	0	0	0	0	0	0	0
	7	5	5	51	20	7	26	1	20	9	1	0	14	24	22	0	13	7	0	1	11	0	0	1	37	1	13	0	1	0	0	0	3	27	0	0	16	9	3	0	0	0	0	0	0	0	0	0	0
	8	2	5	52	33	11	51	9	26	9	0	0	39	35	20	0	11	9	0	5	11	0	0	0	45	0	16	0	5	0	0	0	7	33	0	1	16	0	5	0	0	0	0	0	1	0	0	0	0
	9	16	2	59	30	13	75	49	35	5	15	0	59	45	29	0	19	14	3	41	7	3	13	35	41	3	19	5	59	0	0	0	11	29	0	1	23	13	9	0	0	3	0	0	0	3	0	0	0
	10	18	16	55	37	7	69	75	31	13	5	0	59	43	26	0	13	24	5	31	7	5	58	15	41	1	28	3	55	0	0	0	14	41	0	0	13	13	3	0	1	0	0	0	0	0	0	0	0
	11	46	18	62	37	19	60	66	27	15	13	0	64	43	30	0	11	20	5	27	21	3	54	1	42	1	34	0	43	0	0	0	13	39	3	3	16	5	3	3	0	0	0	0	0	0	0	0	3
	12	56	46	64	53	5	40	52	35	14	11	0	59	48	33	1	37	20	7	31	18	3	30	0	37	7	28	3	11	0	0	0	3	38	5	0	28	11	5	3	0	1	0	0	0	0	0	1	0
2012	1	125	56	65	61	11	37	26	32	16	54	1	53	39	27	3	24	9	20	9	26	5	14	0	31	5	1	31	0	3	0	1	11	28	3	0	31	1	3	0	1	1	0	1	0	0	0	0	34
	2	116	125	79	64	21	46	23	48	13	59	5	57	44	32	9	26	11	27	11	31	15	21	0	40	3	5	54	2	11	0	24	3	30	37	0	15	13	7	4	10	18	3	0	0	0	0	0	7
	3	212	116	77	58	24	37	24	51	16	48	0	56	44	36	3	20	11	18	27	20	22	11	5	59	9	13	59	5	5	0	3	12	31	11	0	14	18	1	0	20	44	0	3	1	0	3	0	9
	4	49	212	66	53	15	19	17	37	15	25	0	54	42	21	1	13	17	9	11	17	5	13	0	44	3	17	52	1	0	0	0	9	31	0	1	15	15	1	0	1	11	1	0	0	0	0	0	0
	5	33	49	65	39	13	24	18	35	1	20	0	29	31	41	1	22	7	5	14	16	3	1	0	42	5	18	28	1	0	0	1	1	24	1	1	9	7	3	0	0	0	0	0	0	1	0	1	0
	6	29	33	55	42	11	25	23	40	3	5	0	25	31	38	0	23	5	1	0	19	0	3	0	48	0	11	0	0	0	0	0	5	39	0	0	5	9	3	0	0	0	0	0	0	0	0	0	0
	7	21	29	49	24	9	24	20	20	5	11	0	31	30	26	0	14	7	0	0	12	0	0	1	30	0	13	0	0	1	0	0	1	26	0	0	11	7	0	0	0	0	1	0	0	0	0	0	0
	8	24	21	48	20	3	43	33	35	3	22	0	39	31	18	0	18	0	3	0	24	0	0	0	33	0	11	0	5	0	0	0	5	28	0	0	9	1	3	0	0	0	0	0	0	0	1	0	0
	9	44	24	46	17	3	63	64	32	11	5	0	47	25	17	0	20	19	1	1	9	5	11	13	39	0	17	0	21	0	1	0	5	27	0	0	9	3	1	0	0	1	0	0	0	0	0	0	0
	10	63	44	52	22	5	68	75	31	13	16	0	49	35	25	0	16	24	1	7	21	7	56	1	43	0	11	0	20	1	0	1	3	27	0	0	5	3	0	0	1	0	0	0	0	0	0	0	0
	11	81	63	58	33	5	62	63	40	7	9	0	53	21	29	0	13	21	7	19	11	7	52	0	36	1	30	0	11	1	0	0	9	35	0	0	5	1	2	0	0	3	0	0	0	0	0	0	1
	12	101	81	69	29	7	40	39	33	14	20	0	50	35	24	1	24	12	1	9	28	3	16	0	33	0	14	0	0	1	1	0	3	34	0	1	9	0	0	0	1	0	0	0	0	5	3	0	0
2013	1	240	101	112	73	46	54	38	46	25	61	34	50	37	58	62	20	22	18	22	18	7	11	0	57	11	24	39	1	5	0	13	37	42	38	3	1	26	5	0	0	0	3	3	52	0	0	0	0
	2	134	240	66	49	8	29	14	24	8	39	8	27	16	28	4	14	0	4	4	14	4	0	0	35	2	6	29	0	2	0	4	8	44	4	0	18	4	0	0	0	0	0	0	16	0	0	2	0
	3	167	134	67	45	11	29	22	28	0	28	1	47	42	34	3	7	5	1	9	12	7	0	0	40	1	9	29	0	0	0	3	9	28	3	0	24	5	1	0	0	1	1	0	1	0	0	0	0
	4	95	167	109	73	33	42	17	58	33	44	5	44	68	63	27	23	27	11	17	51	25	0	3	52	17	25	34	1	3	3	18	21	33	19	15	58	15	22	0	1	3	1	13	40	1	1	11	5
	5	62	95	55	37	3	16	7	37	9	9	0	16	26	39	0	3	1	0	1	20	3	0	0	15	0	1	0	0	1	1	1	7	18	0	0	34	0	1	0	0	0	0	5	7	0	0	0	1
	6	49	62	41	9	5	15	7	23	3	1	0	15	21	19	0	9	3	0	0	9	0	0	0	17	0	9	1	0	0	1	0	0	19	0	0	21	1	0	0	0	0	0	0	7	0	0	0	0
	7	34	49	80	62	7	31	11	32	5	0	0	24	29	16	1	16	0	1	1	43	0	1	0	14	0	1	3	0	1	0	0	0	43	0	0	11	0	0	0	0	0	0	0	56	0	0	0	0
	8	46	34	110	76	3	72	40	33	7	24	0	39	42	3	0	14	5	0	1	29	1	7	0	11	6	0	0	0	1	0	1	0	39	0	0	12	1	5	1	0	0	0	0	55	1	0	0	0
	9	64	46	116	76	9	134	117	48	7	9	0	71	47	13	0	17	9	1	9	59	3	45	7	11	0	1	0	7	1	0	0	0	36	1	1	11	3	0	5	0	0	0	1	51	0	0	1	0
	10	84	64	169	78	3	136	123	44	11	7	0	81	53	7	0	7	11	3	16	31	5	78	1	11	0	3	1	11	0	0	0	0	13	9	0	9	1	0	3	0	0	0	0	45	0	0	0	0
	11	113	84	151	66	0	112	110	30	11	17	0	104	52	11	1	9	15	5	29	36	3	74	7	13	5	11	0	9	1	0	0	1	11	1	1	5	0	1	13	0	0	0	1	15	3	0	0	0
	12	225	113	156	53	18	97	72	58	52	51	1	101	51	11	0	29	9	12	9	54	0	46	1	33	3	0	1	0	0	5	26	0	14	11	1	5	5	7	16	3	0	0	3	32	1	0	3	0
2014	1	445	225	192	108	55	79	50	82	95	79	13	91	71	54	9	25	14	16	9	46	1	18	3	51	11	3	3	1	7	14	13	14	73	5	0	5	7	9	5	0	3	1	0	88	1	1	5	1
	2	211	445	152	78	18	64	32	47	73	33	16	75	70	47	2	26	8	2	4	49	2	6	4	125	4	6	0	2	16	4	12	0	36	0	0	8	8	2	2	0	0	0	2	75	2	2	0	0
	3	279	211	142	74	14	59	14	39	50	27	1	91	35	9	1	11	12	1	11	55	5	5	0	39	5	3	0	0	0	0	3	1	20	0	0	0	3	0	0	0	0	0	3	37	5	0	1	0
	4	67	279	146	56	7	50	9	37	15	28	1	65	64	5	0	19	5	7	5	34	3	5	0	17	3	0	0	0	0	0	0	0	21	0	1	3	0	0	7	0	0	0	0	23	17	0	0	0
	5	54	67	135	43	11	26	16	46	1	11	0	54	63	3	0	24	9	3	3	44	0	3	1	7	0	0	1	0	0	1	0	0	33	0	0	7	7	0	9	0	1	0	0	9	11	0	0	0
	6	41	54	130	23	7	34	17	40	1	0	1	28	34	9	0	11	0	3	0	35	0	1	0	13	0	0	0	0	1	0	0	0	24	0	0	9	21	0	3	0	0	0	0	7	11	0	0	0
	7	25	41	121	11	3	24	25	33	0	5	0	18	42	7	0	3	1	1	0	50	0	0	0	13	0	0	0	1	0	0	0	0	16	0	0	9	7	0	0	0	1	0	0	3	1	0	0	0
	8	47	25	137	22	3	69	55	40	0	12	1	42	55	11	0	22	0	5	0	67	0	16	1	20	0	0	0	0	0	0	3	0	22	1	0	1	14	3	1	0	0	0	0	12	3	1	0	0
	9	64	47	133	17	5	129	144	49	0	13	0	76	35	1	0	24	1	5	3	40	2	87	1	30	0	0	1	11	0	0	0	0	13	0	1	0	31	0	3	0	0	0	0	9	1	0	0	0
	10	96	64	135	16	0	133	139	29	1	9	0	84	44	1	0	9	3	1	3	73	0	85	5	15	1	1	0	9	0	0	0	0	14	0	0	0	9	0	0	1	0	0	0	16	3	0	0	0
	11	145	96	147	47	7	106	112	63	7	15	0	87	50	5	0	15	9	3	15	49	0	73	0	11	1	0	1	3	0	0	0	0	9	0	0	0	3	2	6	0	0	0	0	9	0	0	3	0
	12	277	145	191	91	26	95	90	83	30	57	5	115	60	5	11	16	16	20	33	72	14	41	3	20	20	1	1	1	3	0	1	1	25	3	0	0	5	5	0	7	6	0	0	16	0	16	3	0
2015	1	247	277	161	61	27	72	31	59	25	31	1	91	53	3	5	9	3	7	5	37	1	7	0	14	7	1	7	0	1	1	1	0	11	1	0	1	0	0	1	0	0	0	1	1	3	1	0	5
	2	208	247	155	58	16	46	10	39	10	23	0	57	53	2	8	22	2	2	4	34	8	0	0	6	0	0	2	0	4	0	0	0	10	12	0	6	0	0	0	0	0	0	2	4	0	0	0	10
	3	246	208	147	69	14	69	7	55	12	26	0	76	58	0	1	7	5	7	9	48	0	3	0	18	0	1	0	0	0	0	0	1	12	9	1	5	0	0	1	1	3	0	0	1	1	0	0	1
	4	129	246	147	56	5	63	7	65	13	17	0	64	49	5	0	5	7	7	14	34	3	1	1	27	4	6	1	0	1	0	1	0	13	0	4	0	7	0	0	0	0	2	0	3	3	0	0	0
	5	82	129	137	32	5	36	7	43	3	3	0	34	51	3	0	13	3	12	1	37	3	3	0	14	0	2	7	0	1	0	1	0	14	1	3	1	0	1	0	3	5	0	0	5	3	0	0	0
	6	64	82	159	49	17	50	23	69	0	2	6	32	73	7	0	19	3	3	3	41	0	5	3	30	1	5	0	1	1	1	5	0	5	3	0	1	1	3	0	4	6	0	0	1	0	1	1	0
	7	50	64	130	41	12	40	28	39	3	0	0	16	40	7	0	9	0	0	2	18	0	0	0	9	0	0	0	0	0	0	0	0	18	0	1	0	1	0	0	0	0	0	0	1	0	0	0	0
	8	59	50	129	45	1	68	70	28	0	7	0	39	46	3	0	12	1	1	0	35	1	5	0	7	0	2	0	0	0	0	0	0	30	0	0	0	0	0	0	0	0	0	0	3	0	0	0	0
	9	72	59	133	57	5	127	158	52	3	11	1	60	57	3	0	11	5	0	4	26	0	62	1	13	0	1	0	23	0	0	0	0	22	0	1	3	3	1	0	1	1	0	0	1	0	0	0	1
	10	99	72	125	37	3	117	149	40	5	3	1	68	39	5	0	22	7	1	1	28	0	73	3	9	1	0	0	12	0	0	1	0	9	1	0	9	0	1	3	0	0	0	0	0	0	0	0	0
	11	119	99	135	76	5	108	105	36	3	9	0	85	54	7	0	32	15	1	7	38	1	57	7	19	1	0	1	7	0	1	0	0	21	0	1	2	3	0	0	0	0	0	0	0	1	0	1	0
	12	123	119	136	81	27	83	65	58	3	9	1	72	55	13	1	24	5	0	9	43	1	33	1	18	3	1	0	1	0	1	0	0	16	1	1	1	3	0	0	1	6	0	0	0	1	0	1	0
